# Supplementary material
Source: HighWire-hosted journal article supplement (https://erj.ersjournals.com/content/59/2/2004587)

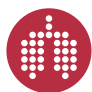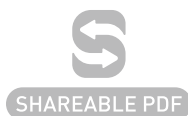

# Effects of nintedanib by inclusion criteria for progression of interstitial lung disease

Toby M. Maher<sup>1,2,3</sup>, Kevin K. Brown<sup>4</sup>, Michael Kreuter<sup>5</sup>, Anand Devaraj<sup>1,6</sup>, Simon L.F. Walsh<sup>1</sup>, Lisa H. Lancaster<sup>7</sup>, Elizabeth A. Belloli<sup>8</sup>, Maria Padilla<sup>9</sup>, Juergen Behr<sup>10</sup>, Rainer-Georg Goeldner<sup>11</sup>, Kay Tetzlaff<sup>12,13</sup>, Rozsa Schlenker-Herceg<sup>14</sup> and Kevin R. Flaherty<sup>15</sup>, on behalf of the INBUILD trial investigators

<sup>1</sup>National Heart and Lung Institute, Imperial College London, London, UK. <sup>2</sup>National Institute for Health Research Clinical Research Facility, Royal Brompton Hospital, London, UK. <sup>3</sup>Keck School of Medicine, University of Southern California, Los Angeles, CA, USA. <sup>4</sup>Dept of Medicine, National Jewish Health, Denver, CO, USA. <sup>5</sup>Center for Interstitial and Rare Lung Diseases, Pneumology and Respiratory Care Medicine, Thoraxklinik, University of Heidelberg, Member of the German Center for Lung Research, Heidelberg, Germany. <sup>6</sup>Dept of Radiology, Royal Brompton Hospital, London. <sup>7</sup>Vanderbilt University Medical Center, Nashville, TN, USA. <sup>8</sup>Division of Pulmonary and Critical Care Medicine, Dept of Internal Medicine, University of Michigan, Ann Arbor, MI, USA. <sup>9</sup>Division of Pulmonary, Critical Care and Sleep Medicine, Icahn School of Medicine at Mount Sinai, New York, NY, USA. <sup>10</sup>Dept of Medicine V, University Hospital, LMU Munich and Asklepios Klinik München-Gauting, Member of the German Centre for Lung Research, Munich, Germany. <sup>11</sup>Boehringer Ingelheim Pharma GmbH & Co. KG, Biberach, Germany. <sup>12</sup>Boehringer Ingelheim International GmbH, Ingelheim am Rhein, Germany. <sup>13</sup>Dept of Sports Medicine, University of Tübingen, Tübingen, Germany. <sup>14</sup>Boehringer Ingelheim Pharmaceuticals, Inc., Ridgefield, CT, USA. <sup>15</sup>Division of Pulmonary and Critical Care Medicine, University of Michigan, Ann Arbor, MI, USA.

Corresponding author: Toby Maher (Toby.Maher@med.usc.edu)

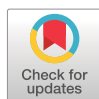

Shareable abstract (@ERSpublications)

In the INBUILD trial in patients with fibrosing ILDs, the relative effect of nintedanib *versus* placebo on reducing the rate of FVC decline was consistent across subgroups based on the criteria regarding ILD progression that patients fulfilled on trial entry <https://bit.ly/35jpOiE>

**Cite this article as:** Maher TM, Brown KK, Kreuter M, *et al.* Effects of nintedanib by inclusion criteria for progression of interstitial lung disease. *Eur Respir J* 2022; 59: 2004587 [DOI: 10.1183/13993003.04587-2020].

This single-page version can be shared freely online.

Copyright ©The authors 2022.

This version is distributed under the terms of the Creative Commons Attribution Non-Commercial Licence 4.0. For commercial reproduction rights and permissions contact [permissions@ersnet.org](mailto:permissions@ersnet.org)

Received: 21 Dec 2020  
Accepted: 4 June 2021

## Abstract

**Background** The INBUILD trial investigated nintedanib *versus* placebo in patients with progressive fibrosing interstitial lung diseases (ILDs). We investigated the decline in forced vital capacity (FVC) in subgroups based on the inclusion criteria for ILD progression.

**Methods** Subjects had a fibrosing ILD other than idiopathic pulmonary fibrosis and met the following criteria for ILD progression within the 24 months before screening despite management deemed appropriate in clinical practice: Group A, relative decline in FVC  $\geq 10\%$  predicted; Group B, relative decline in FVC  $\geq 5$ – $<10\%$  predicted with worsened respiratory symptoms and/or increased extent of fibrosis on high-resolution computed tomography (HRCT); Group C, worsened respiratory symptoms and increased extent of fibrosis on HRCT only.

**Results** In the placebo group, the rates of FVC decline over 52 weeks in Groups A, B and C, respectively, were  $-241.9$ ,  $-133.1$  and  $-115.3$  mL per year in the overall population ( $p=0.0002$  for subgroup-by-time interaction) and  $-288.9$ ,  $-156.2$  and  $-100.1$  mL per year among subjects with a usual interstitial pneumonia (UIP)-like fibrotic pattern on HRCT ( $p=0.0005$  for subgroup-by-time interaction). Nintedanib had a greater absolute effect on reducing the rate of FVC decline in Group A than in Group B or C. However, the relative effect of nintedanib *versus* placebo was consistent across the subgroups ( $p>0.05$  for heterogeneity).

**Conclusions** The inclusion criteria used in the INBUILD trial, based on FVC decline or worsening of symptoms and extent of fibrosis on HRCT, were effective at identifying patients with progressive fibrosing ILDs. Nintedanib reduced the rate of decline in FVC across the subgroups based on the inclusion criteria related to ILD progression.

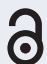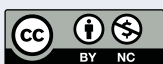

Supplement: inline-supplementary-material-2 [file inline-supplementary-material-2.pdf]
