# Supplementary material
Source: HighWire-hosted journal article supplement (https://erj.ersjournals.com/content/59/2/2004587)
Supplement: inline-supplementary-material-1 [file inline-supplementary-material-1.pdf]

## ONLINE SUPPLEMENTARY MATERIAL

**SUPPLEMENTARY TABLE S1.** Adverse events in the overall population by inclusion criteria for ILD progression.

|                                       | Group A               |                    | Group B               |                | Group C              |                |
|---------------------------------------|-----------------------|--------------------|-----------------------|----------------|----------------------|----------------|
|                                       | Nintedanib<br>(n=160) | Placebo<br>(n=172) | Nintedanib<br>(n=110) | Placebo (n=97) | Nintedanib<br>(n=62) | Placebo (n=61) |
| Any adverse event(s)                  | 152 (95.0)            | 158 (91.9)         | 104 (94.5)            | 85 (87.6)      | 61 (98.4)            | 52 (85.2)      |
| Most frequent adverse events*         |                       |                    |                       |                |                      |                |
| Diarrhoea                             | 107 (66.9)            | 31 (18.0)          | 71 (64.5)             | 33 (34.0)      | 44 (71.0)            | 15 (24.6)      |
| Nausea                                | 50 (31.3)             | 10 (5.8)           | 33 (30.0)             | 15 (15.5)      | 13 (21.0)            | 6 (9.8)        |
| Bronchitis                            | 23 (14.4)             | 21 (12.2)          | 14 (12.7)             | 16 (16.5)      | 4 (6.5)              | 9 (14.8)       |
| Cough                                 | 14 (8.8)              | 23 (13.4)          | 9 (8.2)               | 14 (14.4)      | 10 (16.1)            | 6 (9.8)        |
| Vomiting                              | 33 (20.6)             | 5 (2.9)            | 23 (20.9)             | 9 (9.3)        | 5 (8.1)              | 3 (4.9)        |
| Decreased appetite                    | 21 (13.1)             | 9 (5.2)            | 15 (13.6)             | 5 (5.2)        | 12 (19.4)            | 3 (4.9)        |
| Weight decreased                      | 21 (13.1)             | 6 (3.5)            | 10 (9.1)              | 2 (2.1)        | 10 (16.1)            | 3 (4.9)        |
| ALT increased                         | 28 (17.5)             | 7 (4.1)            | 12 (10.9)             | 2 (2.1)        | 3 (4.8)              | 3 (4.9)        |
| Progression of ILD <sup>†</sup>       | 8 (5.0)               | 27 (15.7)          | 7 (6.4)               | 8 (8.2)        | 1 (1.6)              | 4 (6.6)        |
| Serious adverse event(s) <sup>‡</sup> | 54 (33.8)             | 70 (40.7)          | 36 (32.7)             | 27 (27.8)      | 17 (27.4)            | 13 (21.3)      |
| Fatal adverse event                   | 7 (4.4)               | 10 (5.8)           | 3 (2.7)               | 6 (6.2)        | 1 (1.6)              | 1 (1.6)        |

|                                                                 |           |           |           |         |         |         |
|-----------------------------------------------------------------|-----------|-----------|-----------|---------|---------|---------|
| Adverse event(s) leading to permanent treatment discontinuation | 33 (20.6) | 22 (12.8) | 26 (23.6) | 8 (8.2) | 6 (9.7) | 4 (6.6) |
|-----------------------------------------------------------------|-----------|-----------|-----------|---------|---------|---------|

---

Data are n (%) of subjects with  $\geq 1$  such adverse event reported over 52 weeks (or until 28 days after last trial drug intake in subjects who discontinued trial drug before week 52). Group A: decline in FVC  $\geq 10\%$  predicted; Group B: decline in FVC  $\geq 5$ – $<10\%$  predicted with worsened respiratory symptoms and/or increased extent of fibrosis on HRCT; Group C: worsened respiratory symptoms and increased extent of fibrosis on HRCT only. \*Adverse events reported in  $>15\%$  of subjects in any group, coded based on preferred terms in the Medical Dictionary for Regulatory Activities (MedDRA). <sup>†</sup>Corresponded to MedDRA preferred term “interstitial lung disease”. <sup>‡</sup>Adverse events that resulted in death, were life-threatening, resulted in hospitalisation or prolongation of hospitalisation, resulted in persistent or clinically significant disability or incapacity, were a congenital anomaly or birth defect, or were deemed to be serious for any other reason. ALT, alanine aminotransferase; ILD, interstitial lung disease.
